# Supplementary material for: Kinase Inhibitor Pulldown Assay Identifies a Chemotherapy Response Signature in Triple-negative Breast Cancer Based on Purine-binding Proteins
Source: PubMed Central journal article supplement (PMC10426551; doi:10.1158/2767-9764.crc-22-0501), 2023-08-15
Supplement: crc-22-0501-s02.pdf [file crc-22-0501-s02.pdf]

# Supplementary Figure 1

A

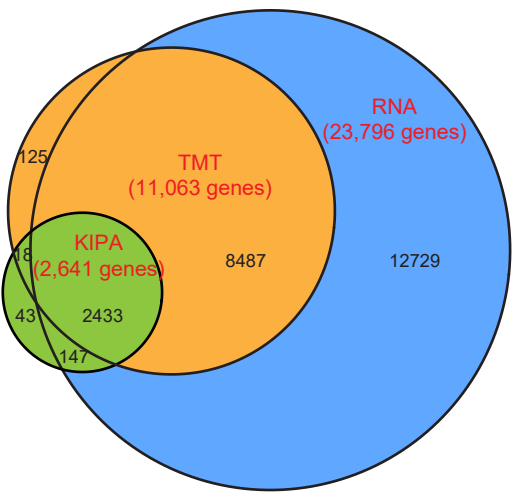

B

191 kinases

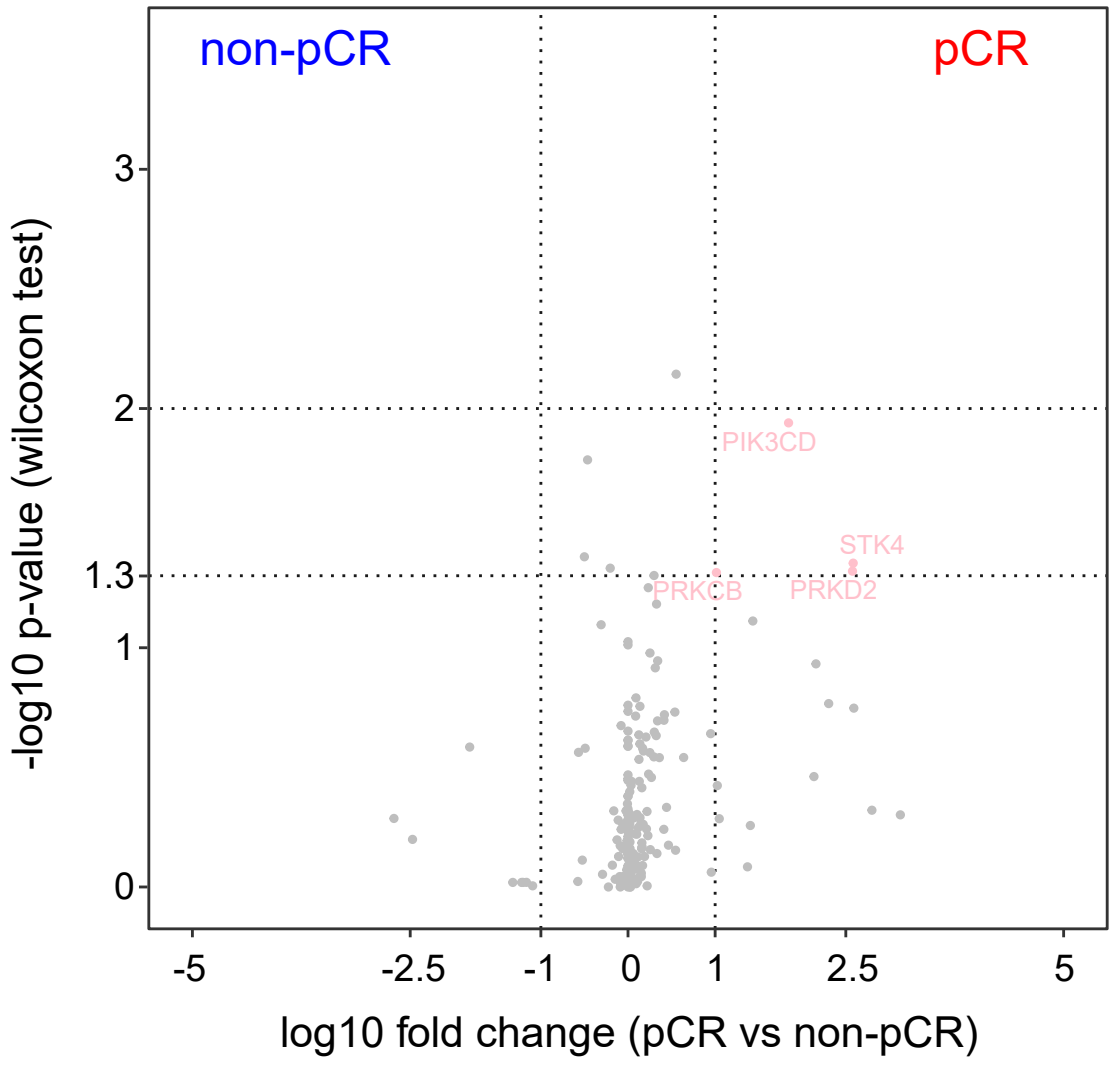

Supplementary Figure 1. (A) Venn diagram shows the overlapping number of proteins across KIPA, RNA-seq and TMT-based proteomics. (B) Volcano plot shows results from differential analysis of human kinases between pCR and non-pCR samples with the KIPA. X-axis is the log<sub>10</sub> fold change between median value of pCR and non-pCR samples for each kinase. Y-axis is the -log<sub>10</sub> p-value from Wilcoxon rank-sum tests comparing kinase levels in pCR samples to non-pCR samples. Pink points indicate significant (0.01 < p < 0.05) proteins.
