# Supplementary material for: Kinase Inhibitor Pulldown Assay Identifies a Chemotherapy Response Signature in Triple-negative Breast Cancer Based on Purine-binding Proteins
Source: PubMed Central journal article supplement (PMC10426551; doi:10.1158/2767-9764.crc-22-0501), 2023-08-15
Supplement: crc-22-0501-s03.pdf [file crc-22-0501-s03.pdf]

# Supplementary Figure 2

A

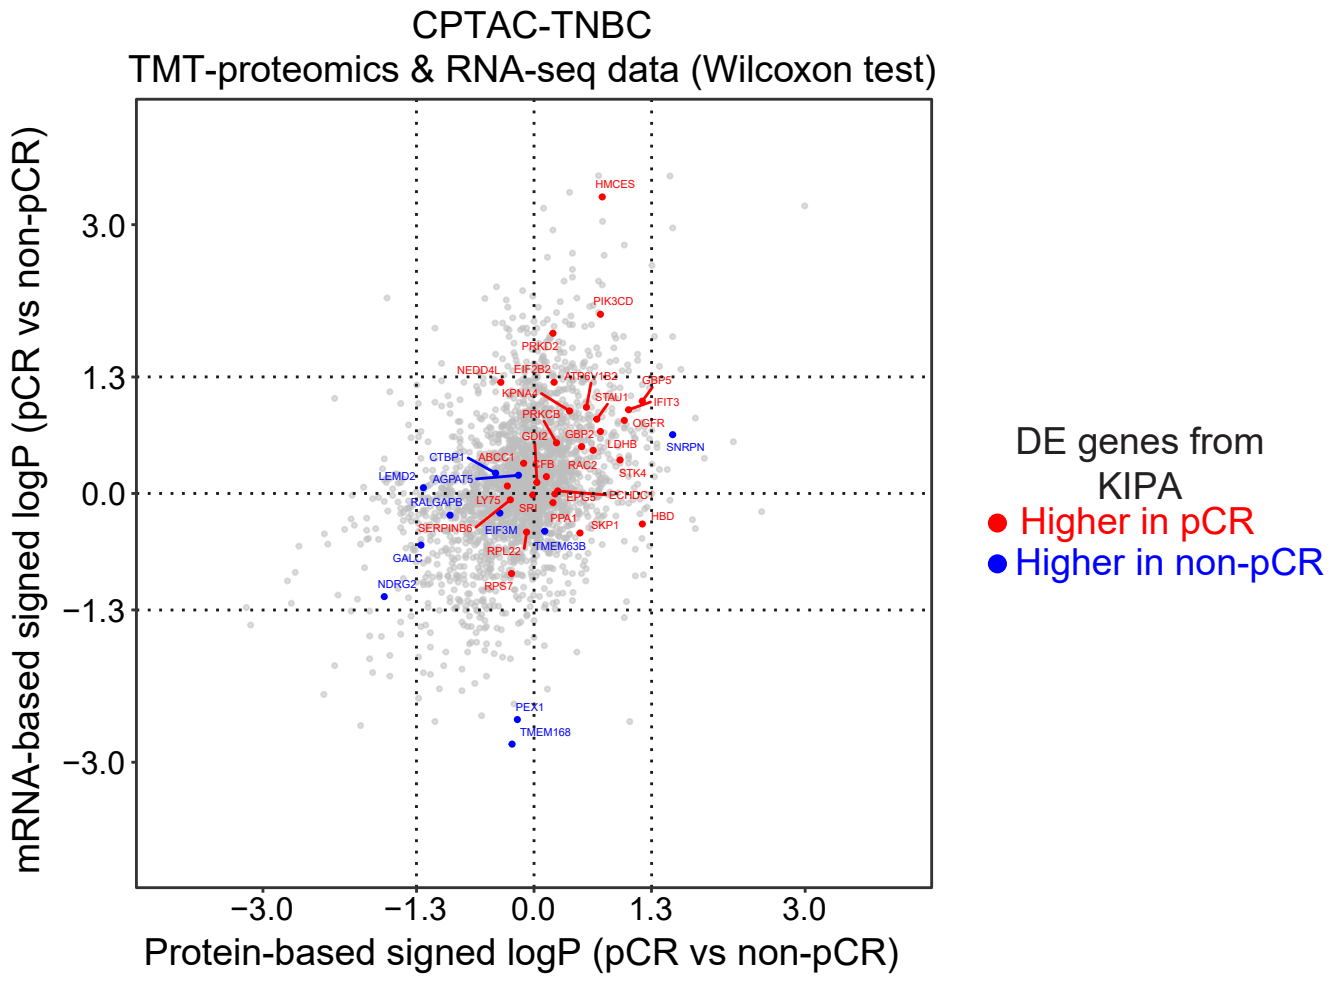

B

| Gene Symbol | Citation number ("chemotherapy" and "breast cancer") |
|-------------|------------------------------------------------------|
| GBP2        | 1                                                    |
| GBP5        | 1                                                    |
| RAC2        | 1                                                    |
| NEDD4L      | 2                                                    |
| LDHB        | 5                                                    |
| KPNA4       | 0                                                    |
| ATP6V1B2    | 0                                                    |

C

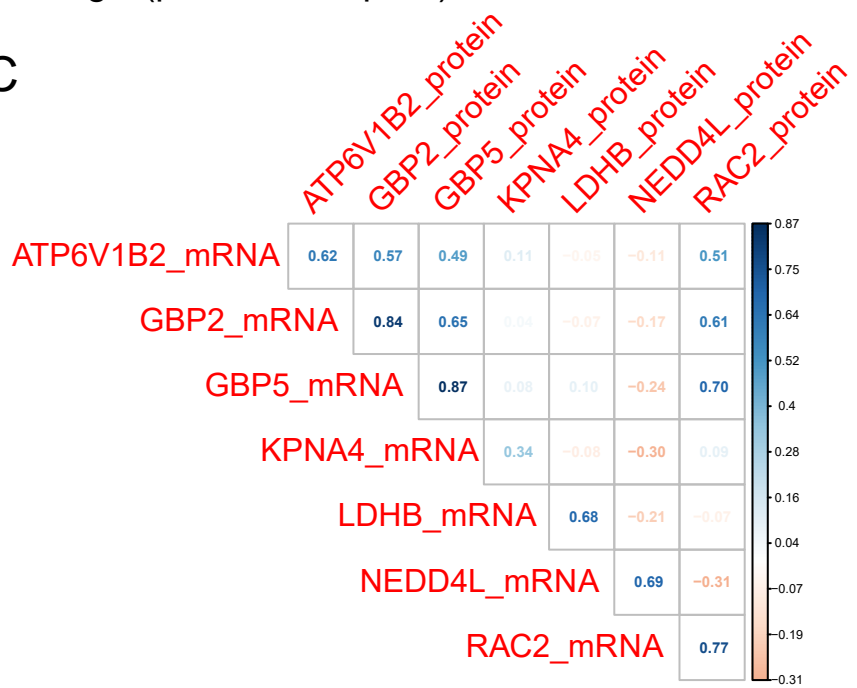

Supplementary Figure 2. (A) Scatter plot shows the signed  $-\log_{10}$  p-value of genes (identified by the KIPA) in TMT-based proteomics and RNA-seq of the CPTAC-TNBC study. p-values were determined by Wilcoxon rank-sum tests comparing the protein (x-axis) and mRNA (y-axis) levels for pCR samples to non-pCR samples. Differential genes from the KIPA ( $p < 0.05$ ) were highlighted in red (higher in pCR) or blue (higher in non-pCR). (B) Citation number of each signature protein in the field of “chemotherapy” and “breast cancer” was obtained using R package RISmed. (C) Matrix shows the correlation between the mRNA levels and protein levels of seven PBP signature genes in the CPTAC-TNBC dataset. The number is the correlation coefficient of each spearman correlation. Blue and red represent positive and negative correlation respectively.
