# Supplementary material for: Kinase Inhibitor Pulldown Assay Identifies a Chemotherapy Response Signature in Triple-negative Breast Cancer Based on Purine-binding Proteins
Source: PubMed Central journal article supplement (PMC10426551; doi:10.1158/2767-9764.crc-22-0501), 2023-08-15
Supplement: crc-22-0501-s04.pdf [file crc-22-0501-s04.pdf]

# Supplementary Figure 3

A

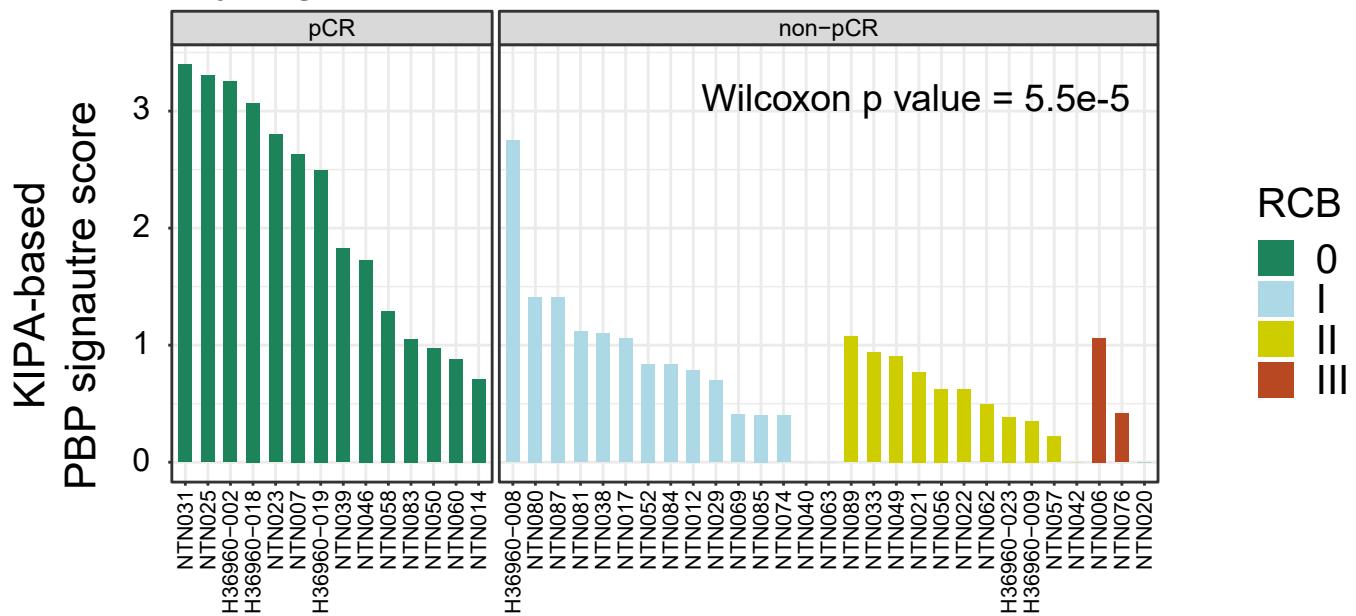

B

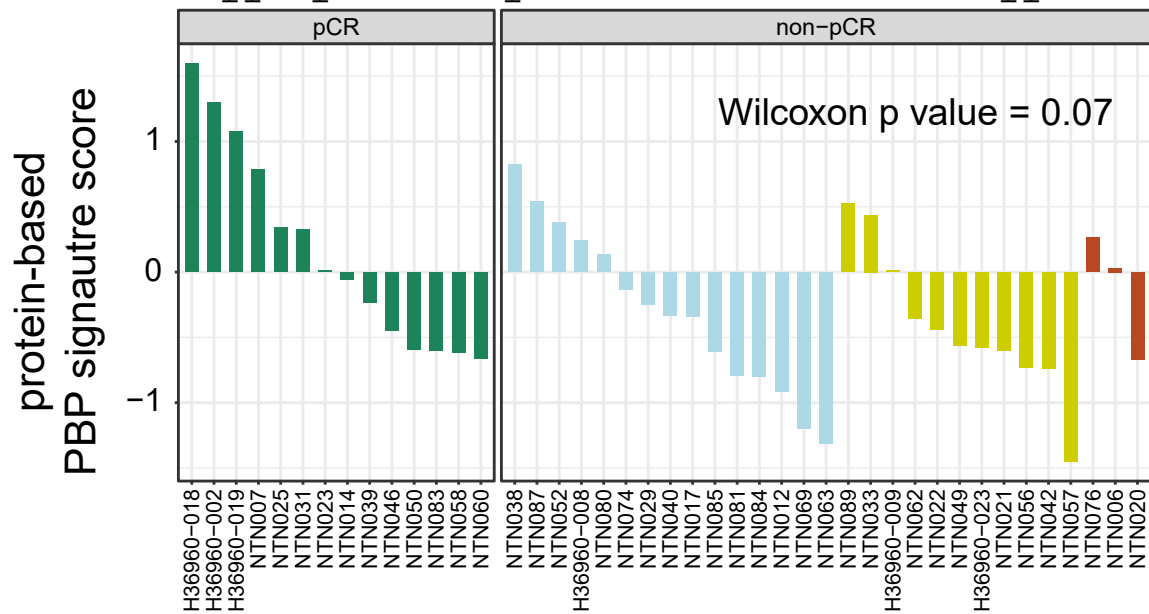

C

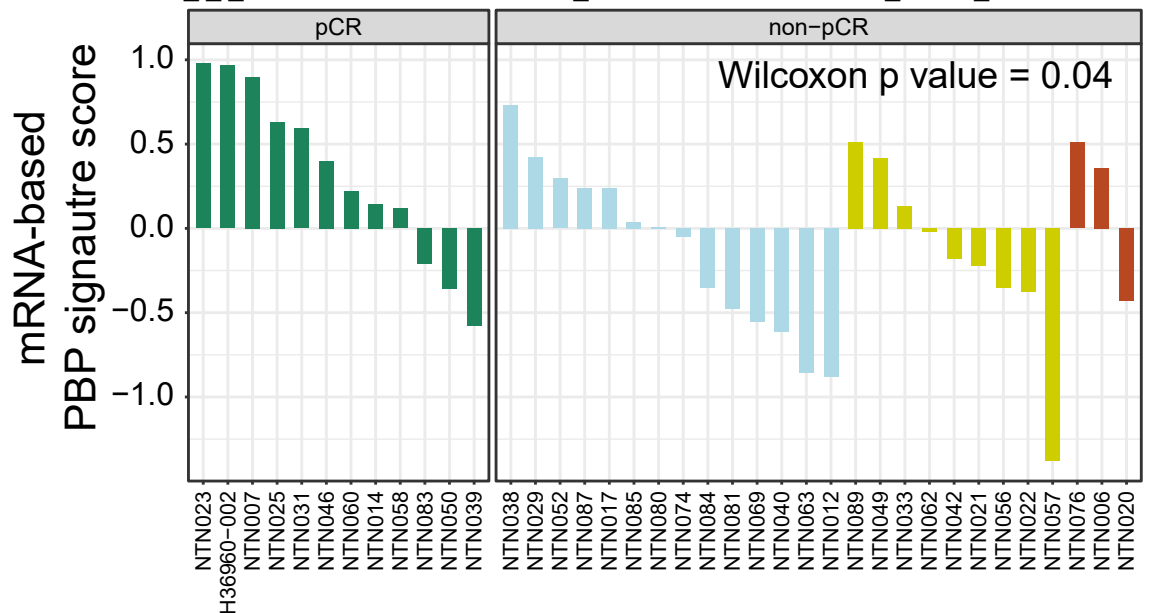

Supplementary Figure 3. Bar plot shows the levels of the PBP signature score in pCR samples (RCB 0) and non-pCR samples (RCB I/II/III) measured by the KIPA (A), the proteomics (B), and the RNA-seq (C). P-values were determined by the Wilcoxon rank-sum test comparing signature levels for pCR samples to non-pCR samples.
