# Supplementary material for: Kinase Inhibitor Pulldown Assay Identifies a Chemotherapy Response Signature in Triple-negative Breast Cancer Based on Purine-binding Proteins
Source: PubMed Central journal article supplement (PMC10426551; doi:10.1158/2767-9764.crc-22-0501), 2023-08-15
Supplement: crc-22-0501-s05.pdf [file crc-22-0501-s05.pdf]

# Supplementary Figure 4

## A Hallmark IFN gamma pathway leading edge genes (protein)

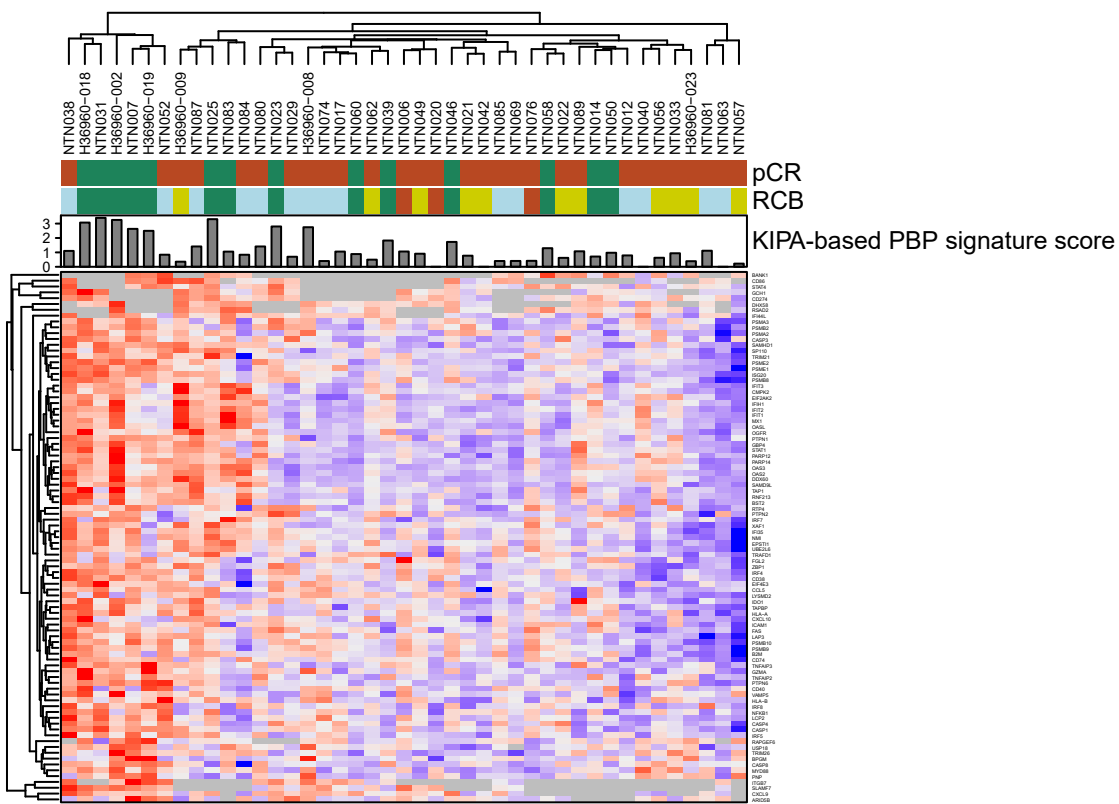

## B Hallmark IFN gamma pathway leading edge genes (mRNA)

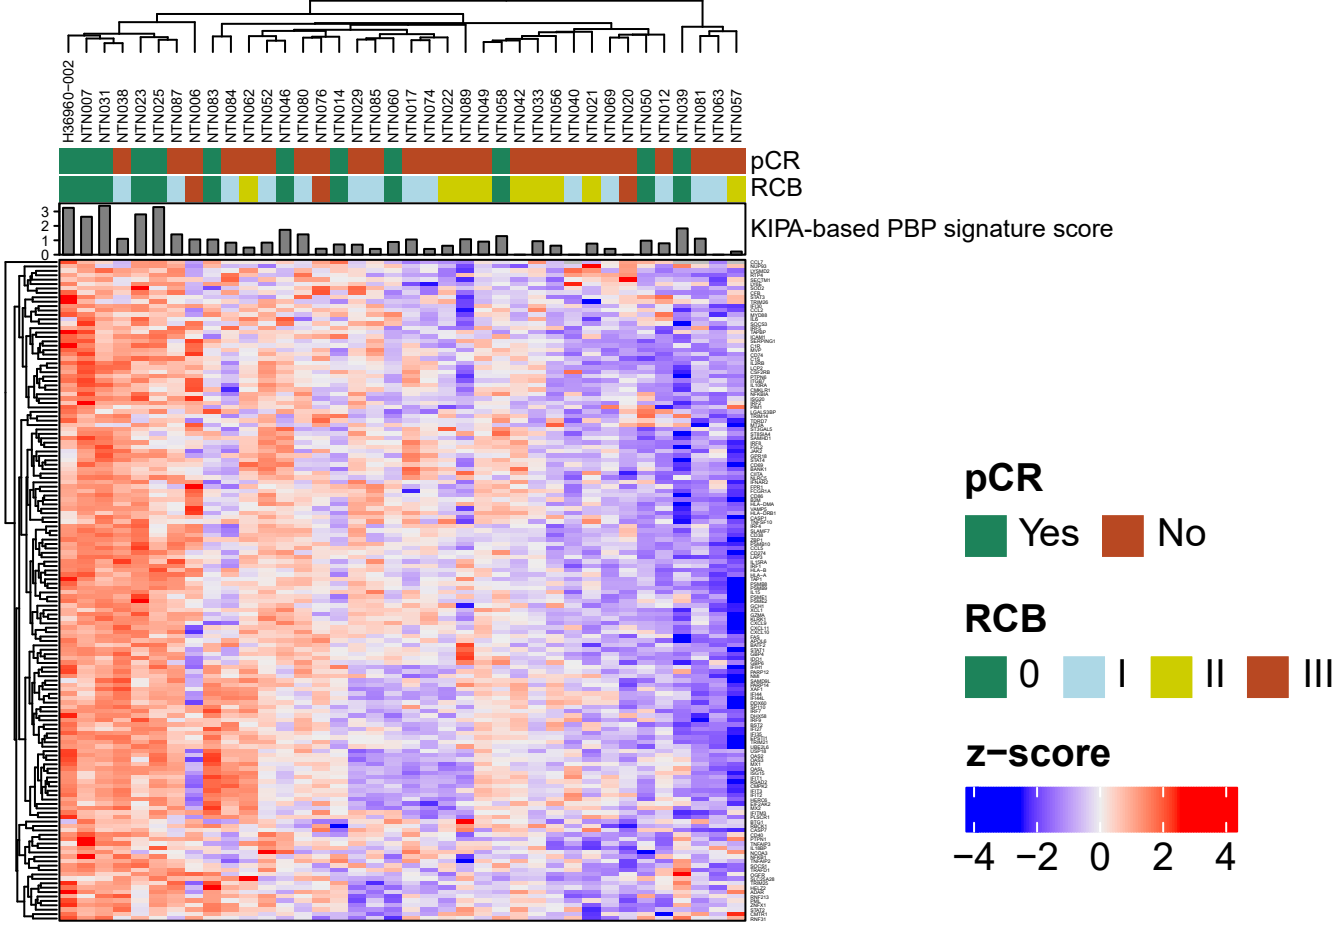

Supplementary Figure 4. Hierarchical clustering heatmap shows the protein (A) and mRNA (B) levels of the leading-edge genes of INTERFERON\_GAMMA\_RESPONSE Hallmark pathway across samples.
