# Supplementary material for: Kinase Inhibitor Pulldown Assay Identifies a Chemotherapy Response Signature in Triple-negative Breast Cancer Based on Purine-binding Proteins
Source: PubMed Central journal article supplement (PMC10426551; doi:10.1158/2767-9764.crc-22-0501), 2023-08-15
Supplement: crc-22-0501-s07.pdf [file crc-22-0501-s07.pdf]

### METABRIC (TNBC subtypes)

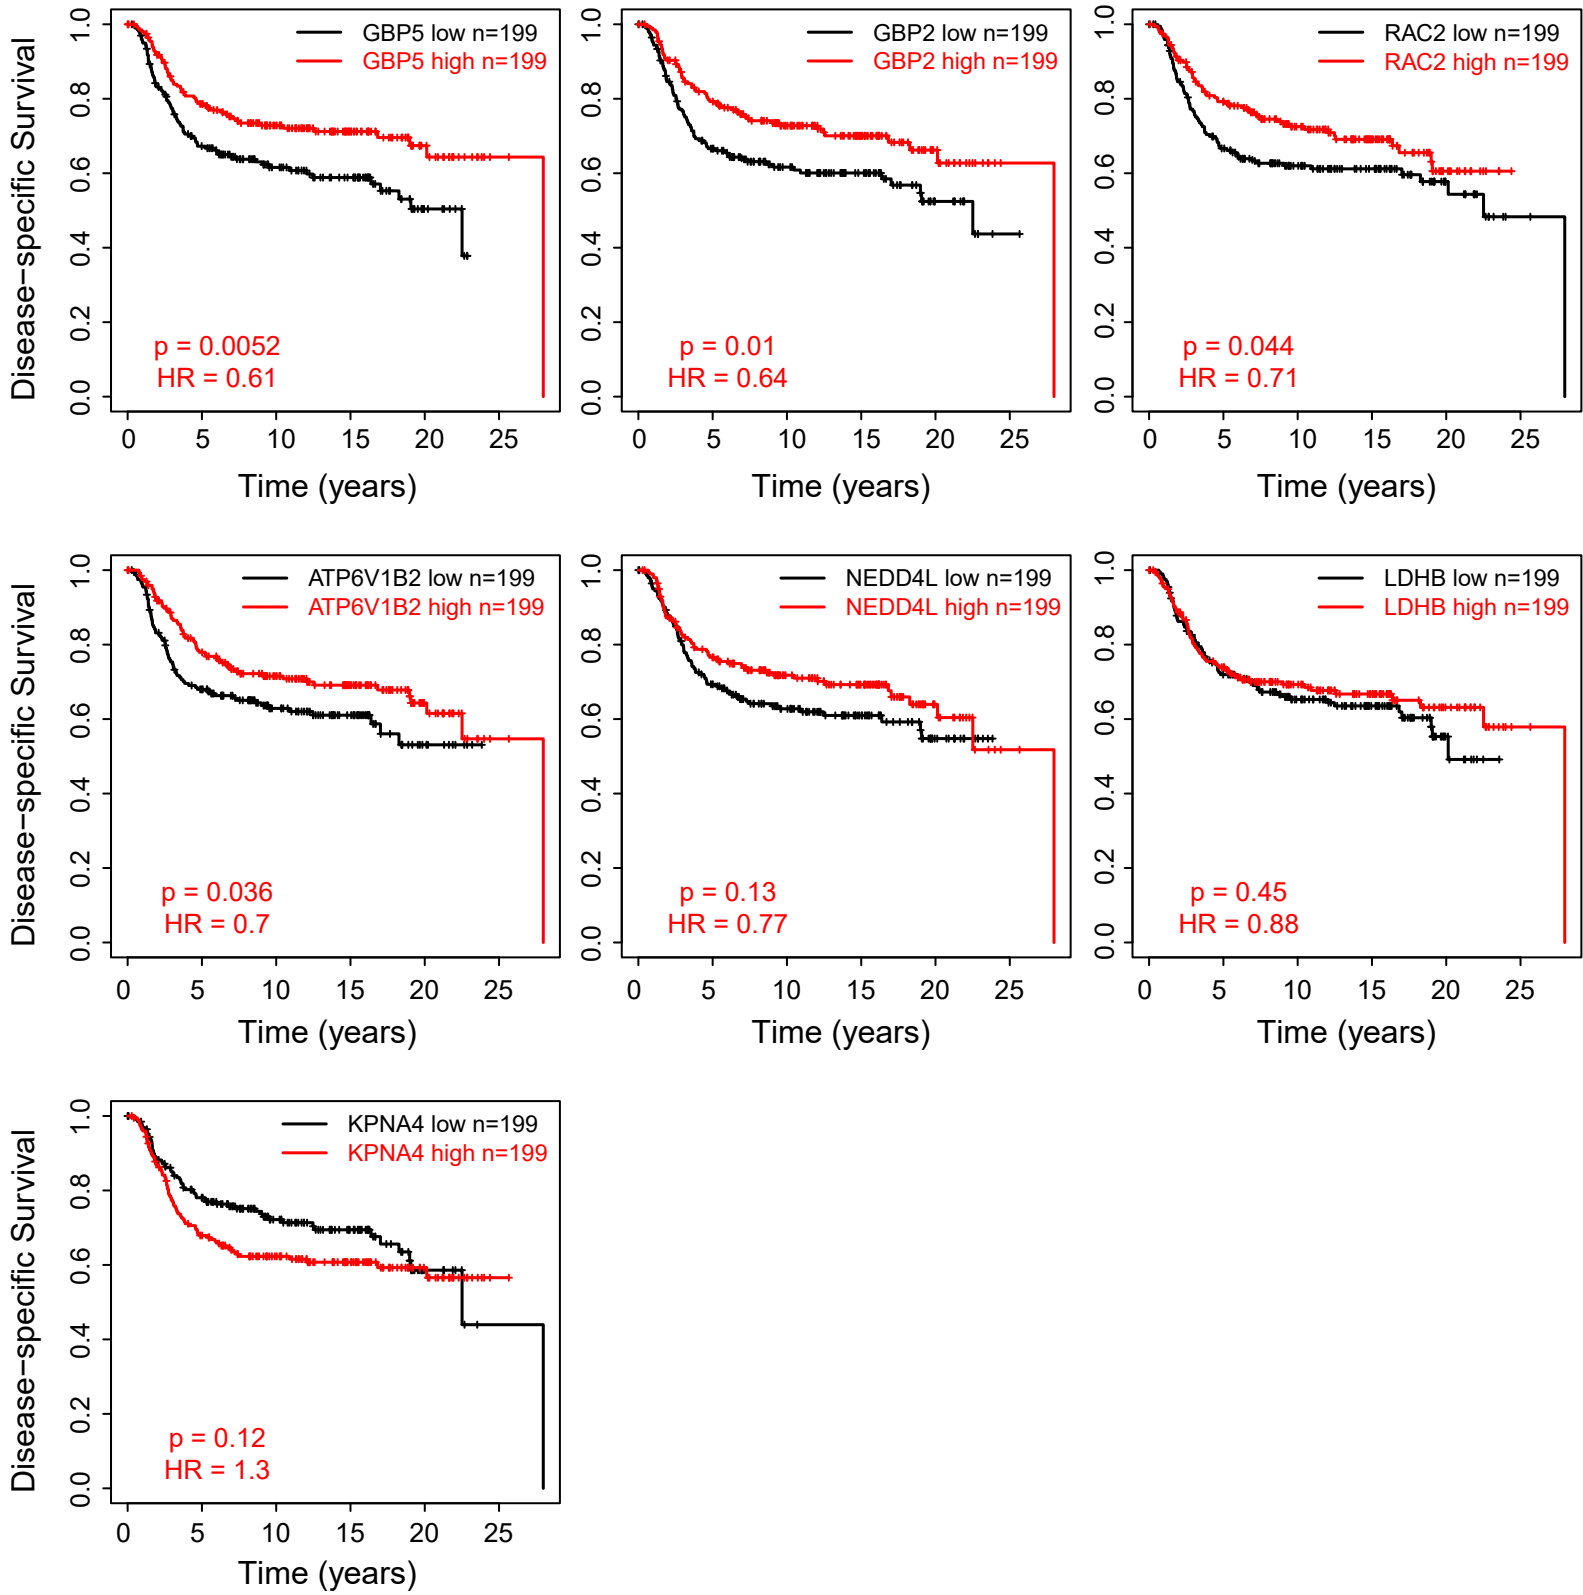

Supplementary Figure 6. Kaplan-Meier (KM) curves show disease-specific survival of TNBC samples from the METABRIC dataset. Samples were categorized into high and low levels of individual signature genes (GBP5, GBP2, RAC2, ATP6V1B2, NEDD4L, LDHB, and KPNA4) based on the median mRNA expression cutoff.
