# Supplementary material for: Kinase Inhibitor Pulldown Assay Identifies a Chemotherapy Response Signature in Triple-negative Breast Cancer Based on Purine-binding Proteins
Source: PubMed Central journal article supplement (PMC10426551; doi:10.1158/2767-9764.crc-22-0501), 2023-08-15
Supplement: crc-22-0501-s08.pdf [file crc-22-0501-s08.pdf]

TCGA pan-cancer analysis

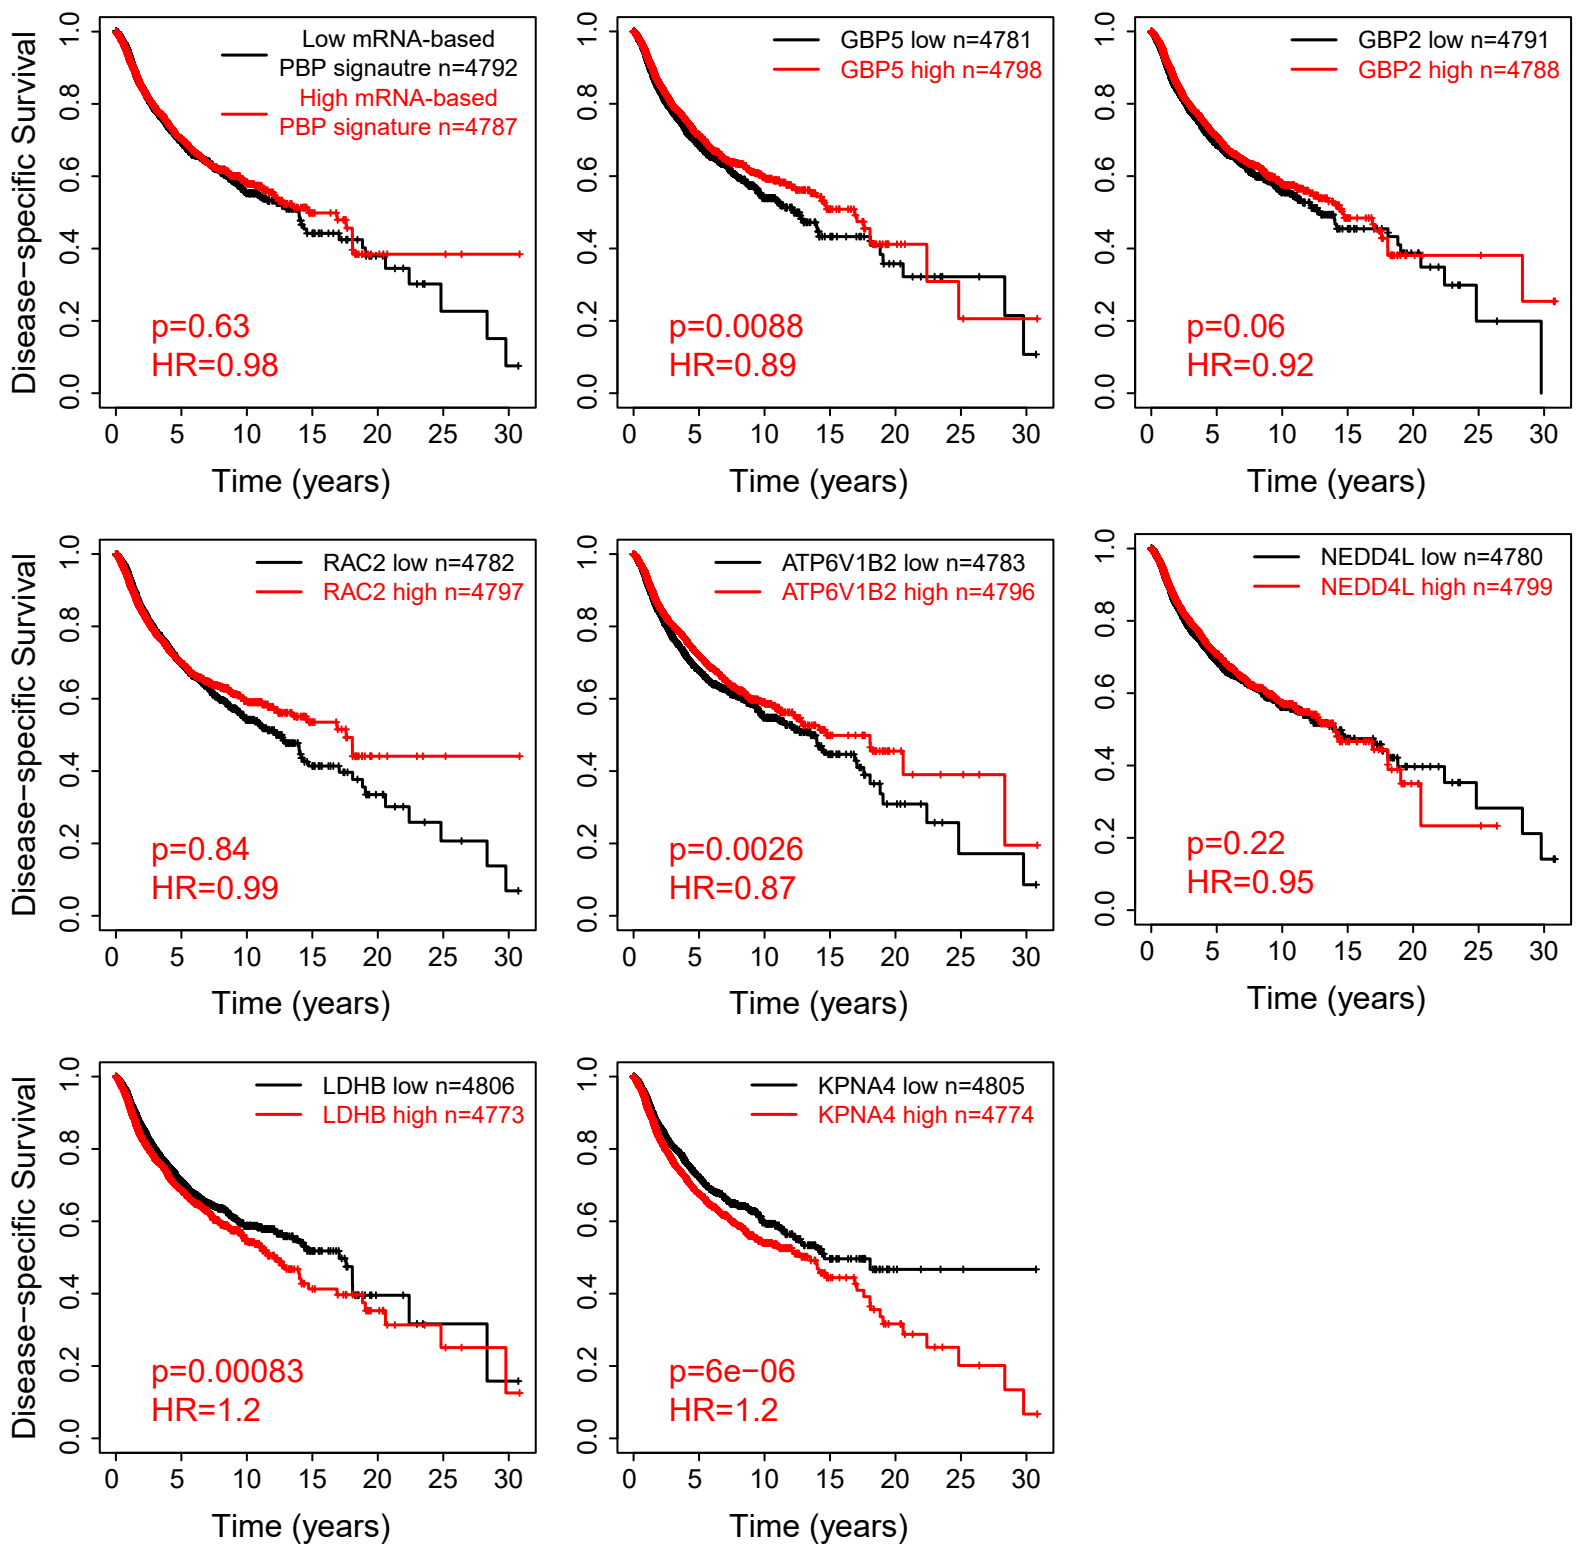

Supplementary Figure 7. Kaplan-Meier (KM) curves show disease-specific survival of cancer samples from the TCGA pan-cancer dataset. Samples were categorized into high and low levels of the PBP signature score or individual signature gene (GBP5, GBP2, RAC2, ATP6V1B2, NEDD4L, LDHB, and KPNA4) based on the median mRNA expression cutoff.
