# Supplementary material for: Kinase Inhibitor Pulldown Assay Identifies a Chemotherapy Response Signature in Triple-negative Breast Cancer Based on Purine-binding Proteins
Source: PubMed Central journal article supplement (PMC10426551; doi:10.1158/2767-9764.crc-22-0501), 2023-08-15
Supplement: crc-22-0501-s09.pdf [file crc-22-0501-s09.pdf]

# Supplementary Figure 8

A

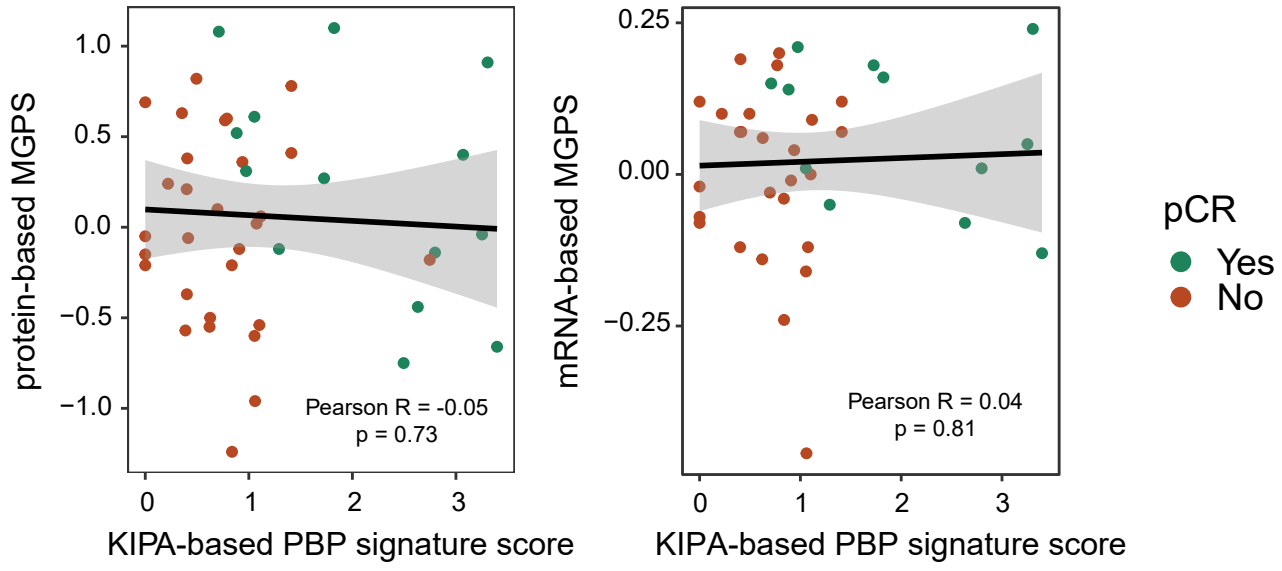

B

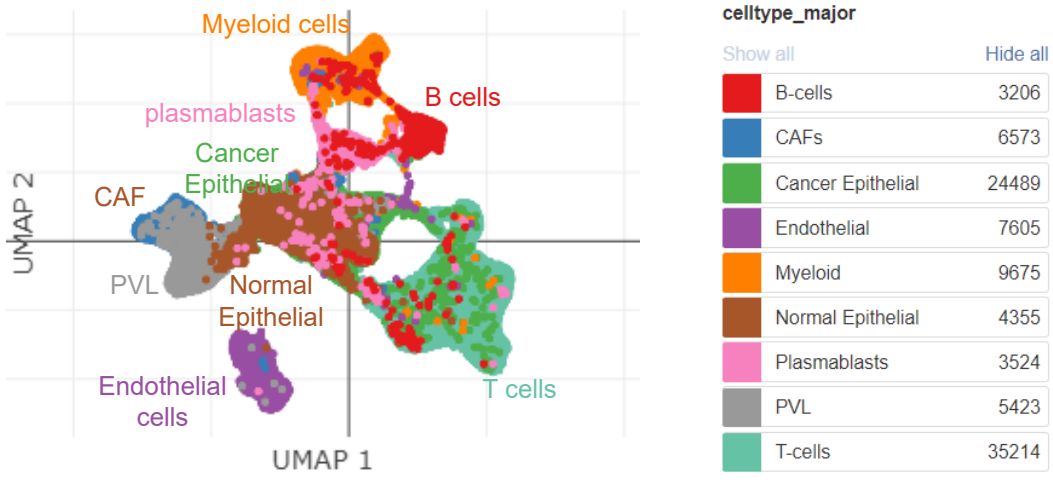

C

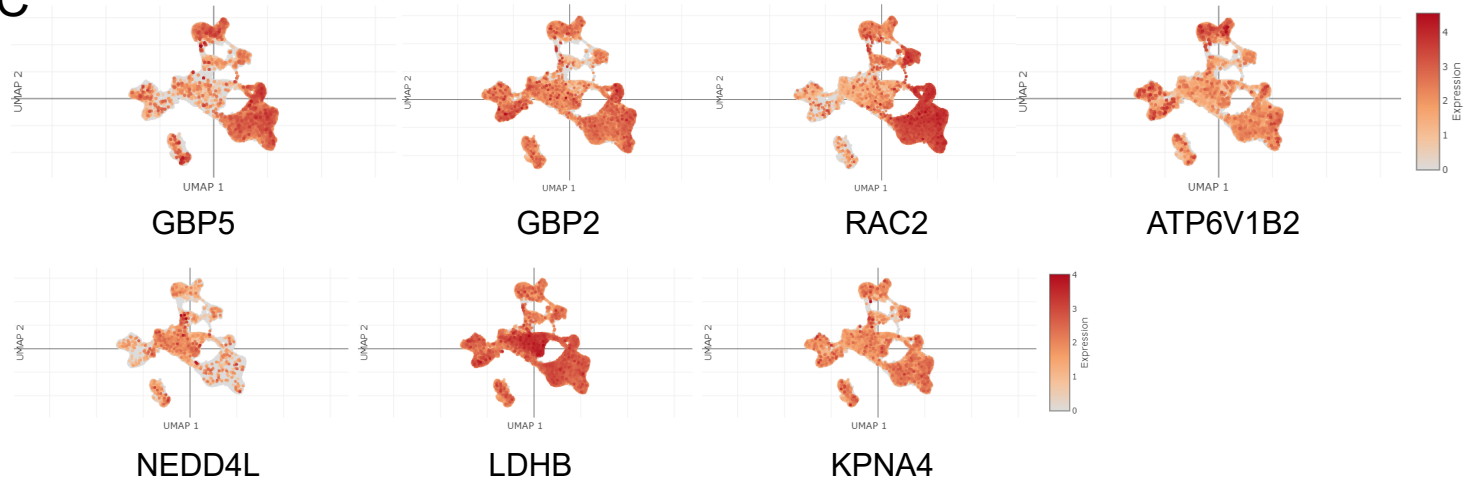

Supplementary Figure 8. (A) Scatter plot shows the correlation between the KIPA-based PBP signature score and protein-based or mRNA-based multigene proliferation scores (MGPS). (B) Single-cell RNA-seq data from a public dataset with 26 primary breast tumors. UMAP visualization shows the cell types annotated in the previous publication (30), generated from the Broad Institute Single Cell portal at [https://singlecell.broadinstitute.org/single\\_cell/study/SCP1039](https://singlecell.broadinstitute.org/single_cell/study/SCP1039). (C) Log-normalized expression of seven PBP signature genes in different clusters, generated from the Broad Institute Single Cell portal.
